# Supplementary material for: Cross-enhancement of ANGPTL4 transcription by HIF1 alpha and PPAR beta/delta is the result of the conformational proximity of two response elements
Source: PubMed Central journal article supplement (PMC4053749; doi:10.1186/gb-2014-15-4-r63), 2014-04-10

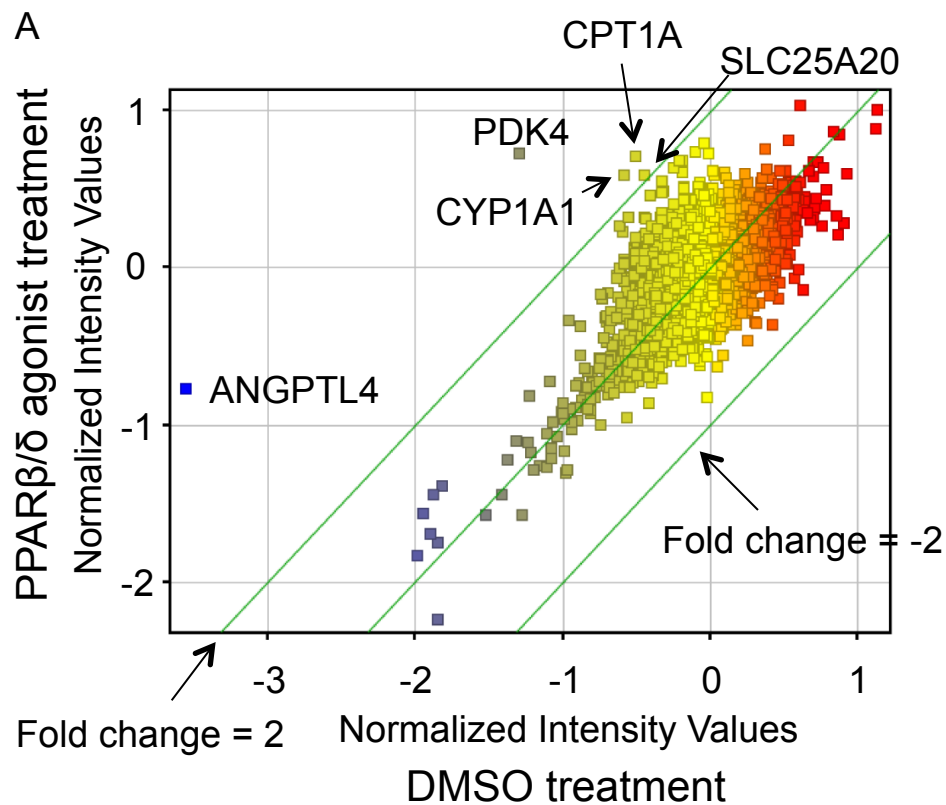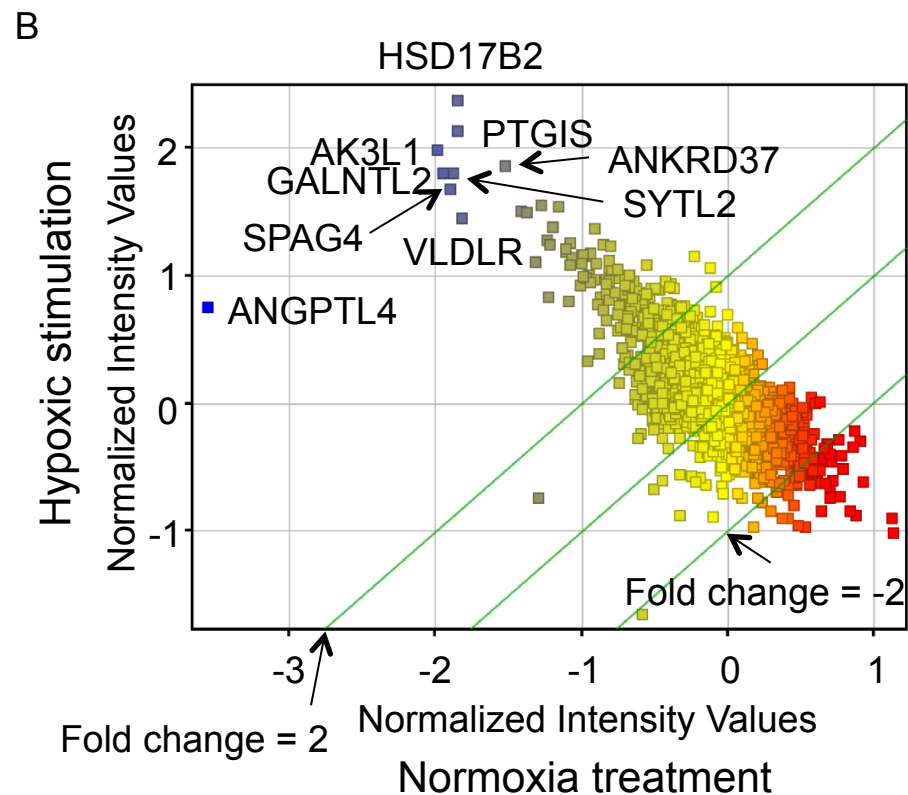

&lt; Cluster 1 &gt;

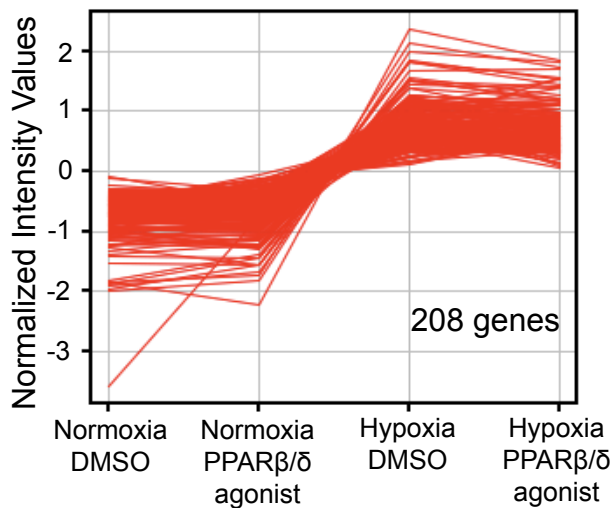

&lt; Cluster 2 &gt;

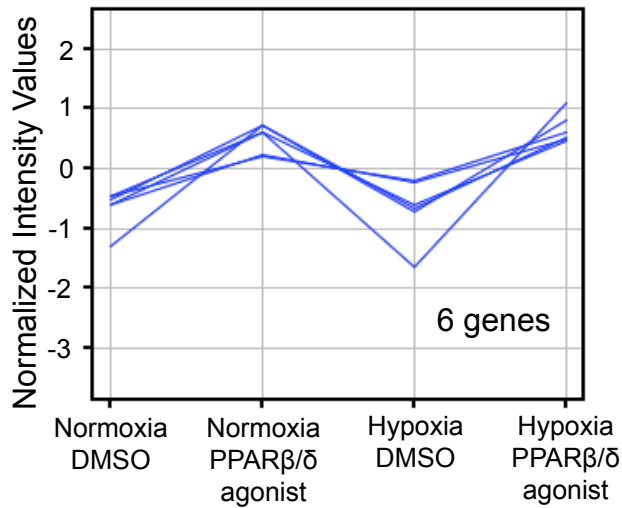

&lt; Cluster 3 &gt;

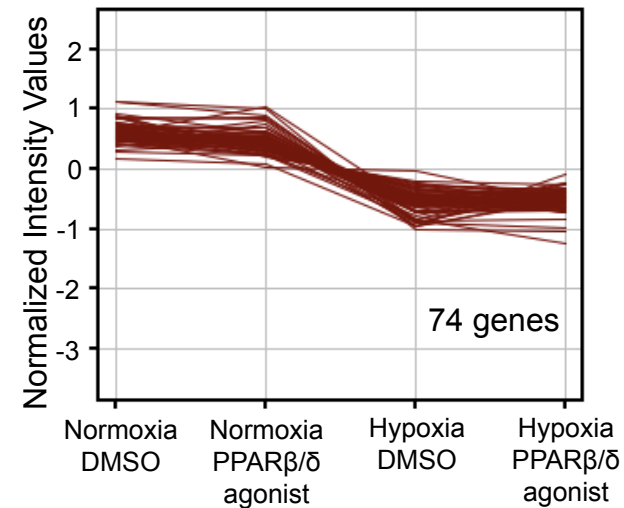

&lt; Cluster 1-1 &gt;

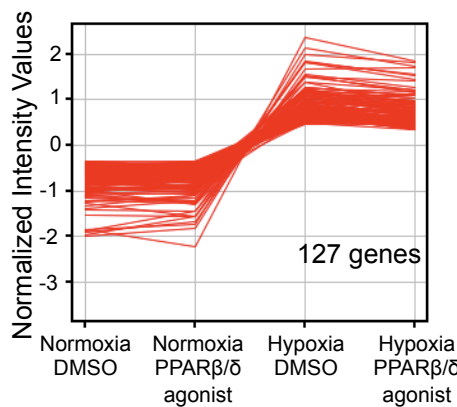

&lt; Cluster 1-2 &gt;

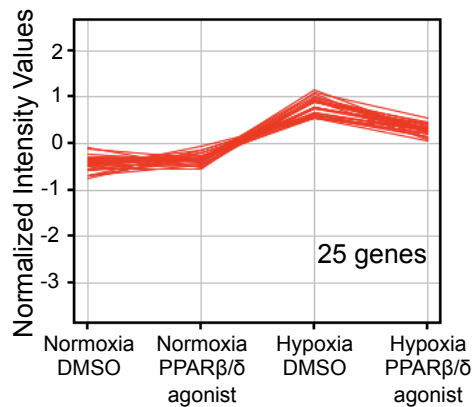

&lt; Cluster 1-3 &gt;

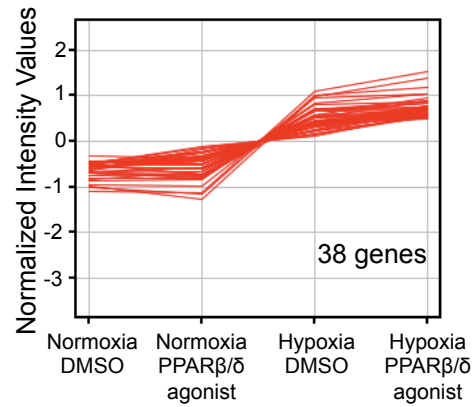

&lt; Cluster 1-4 &gt;

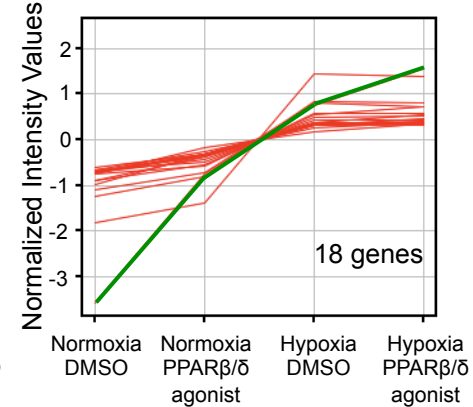

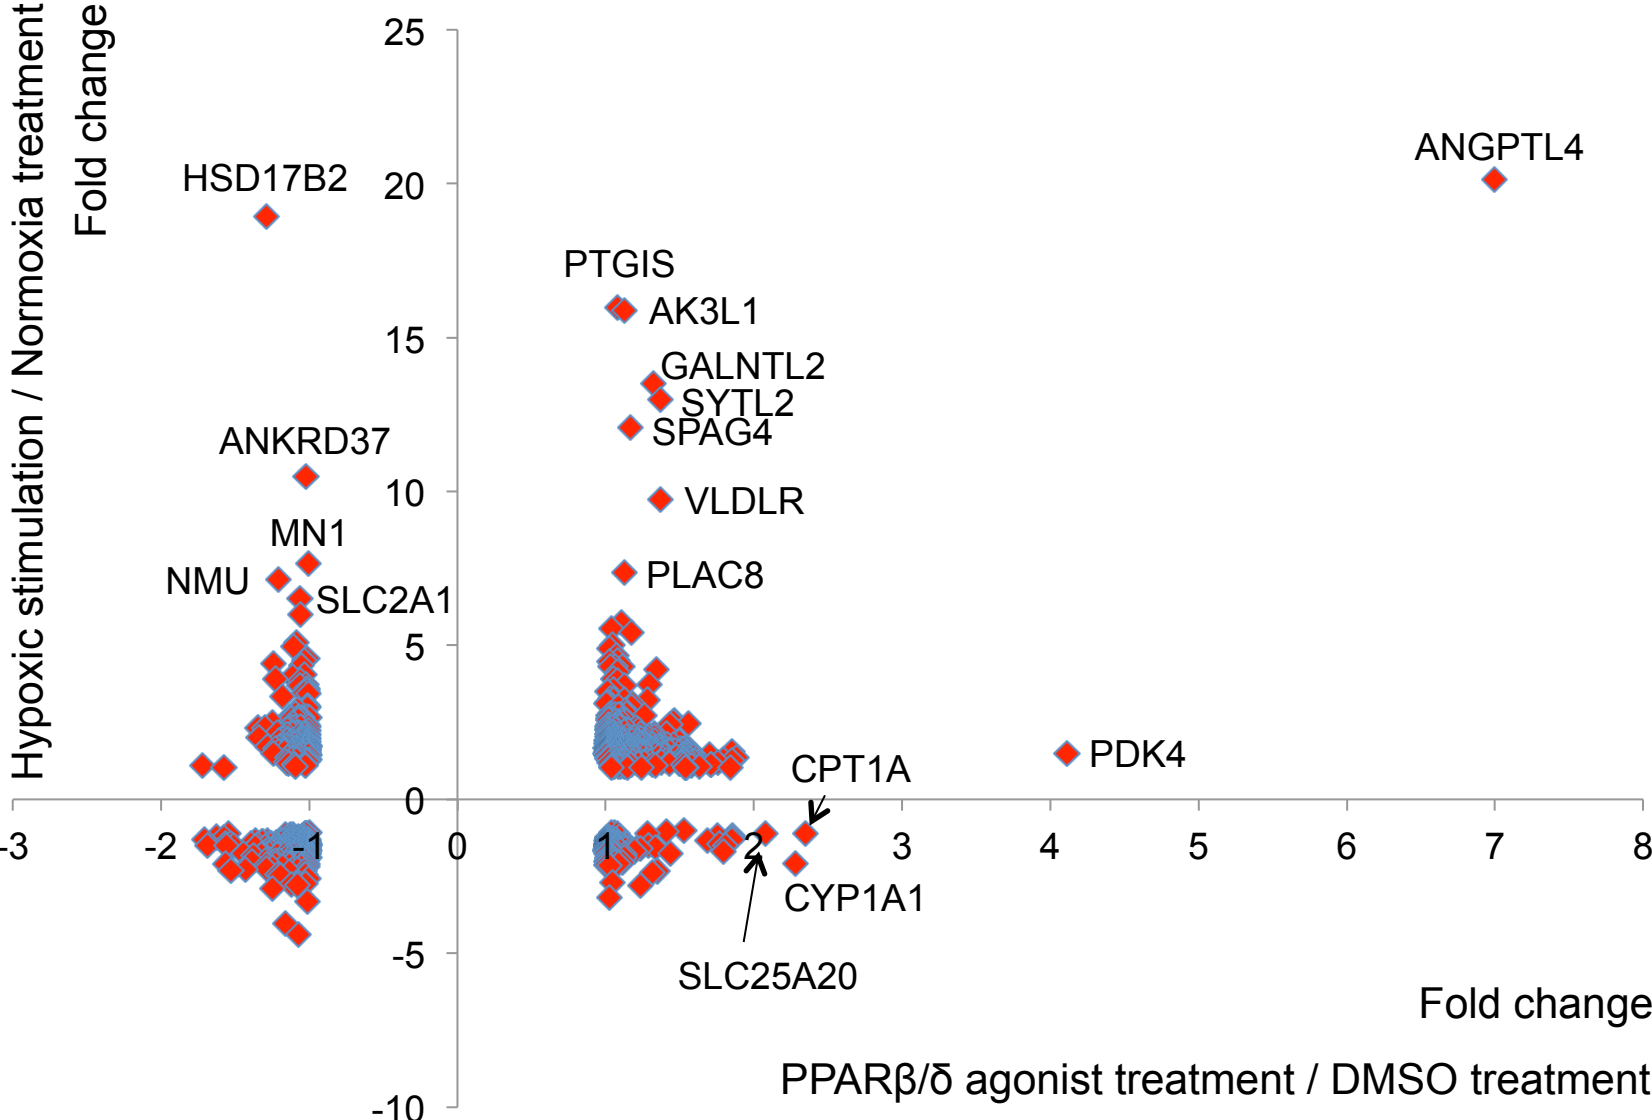

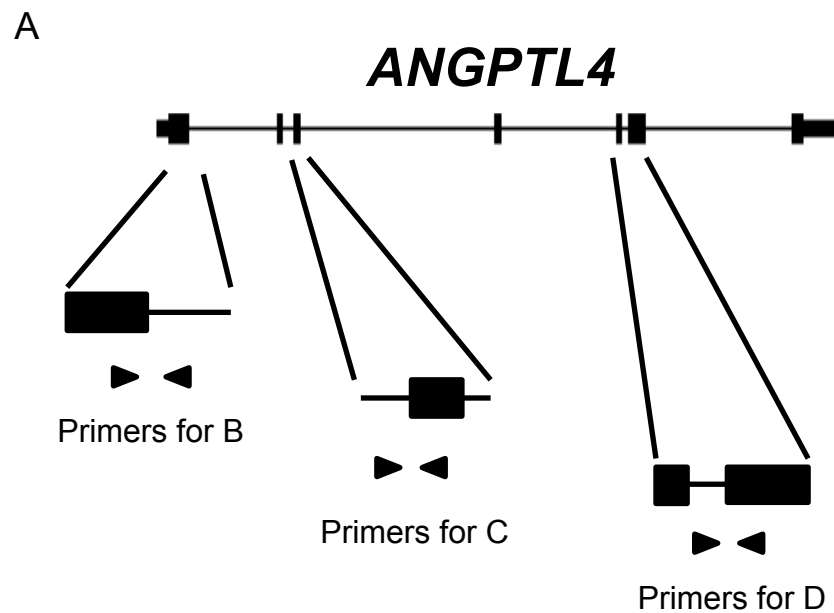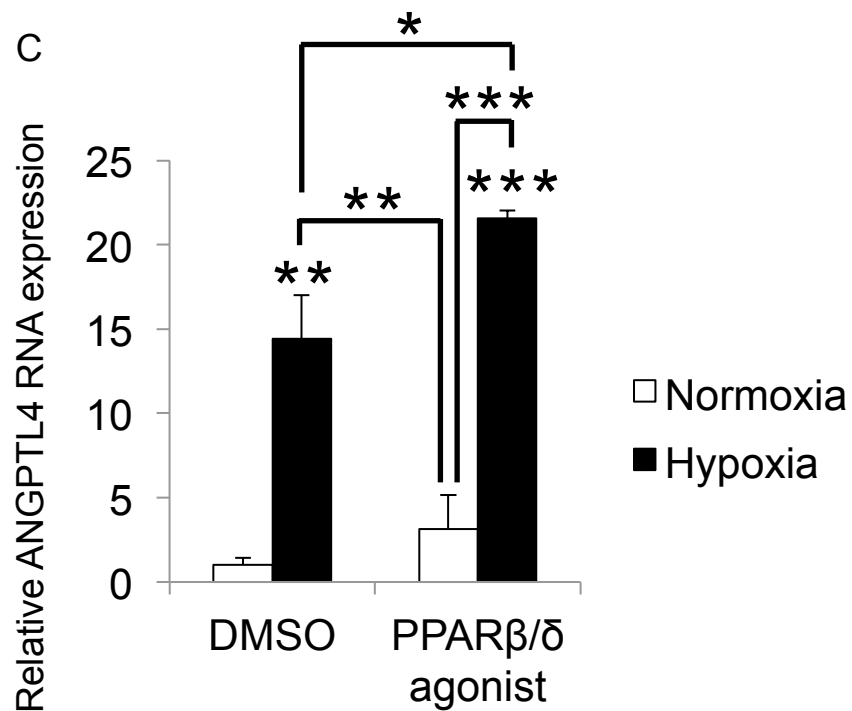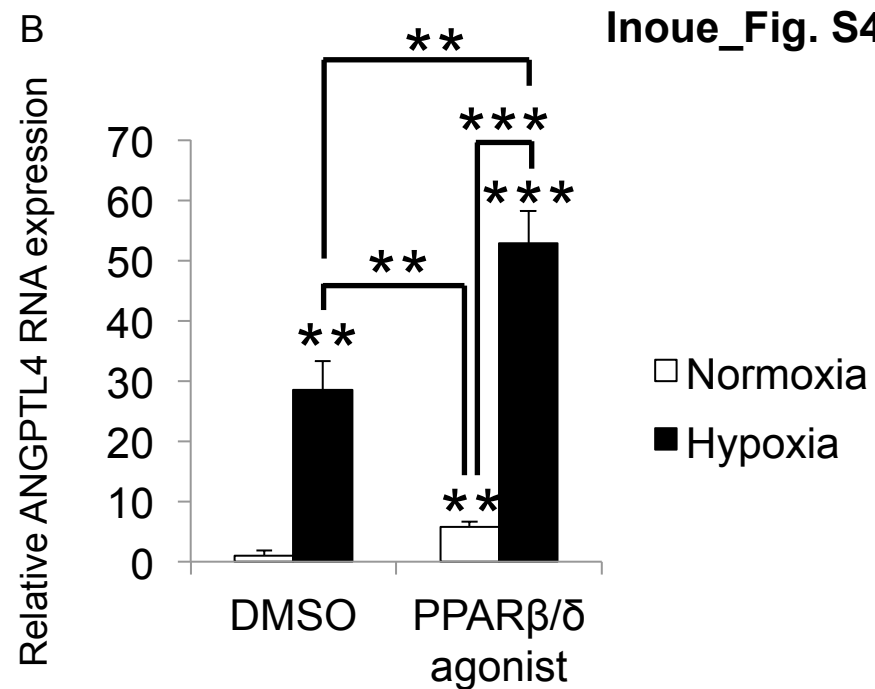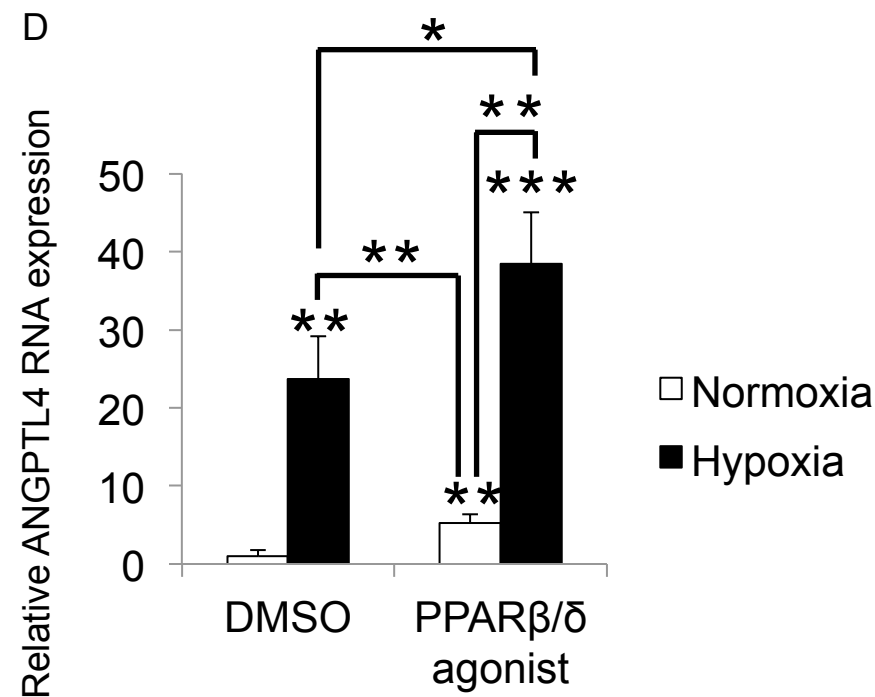

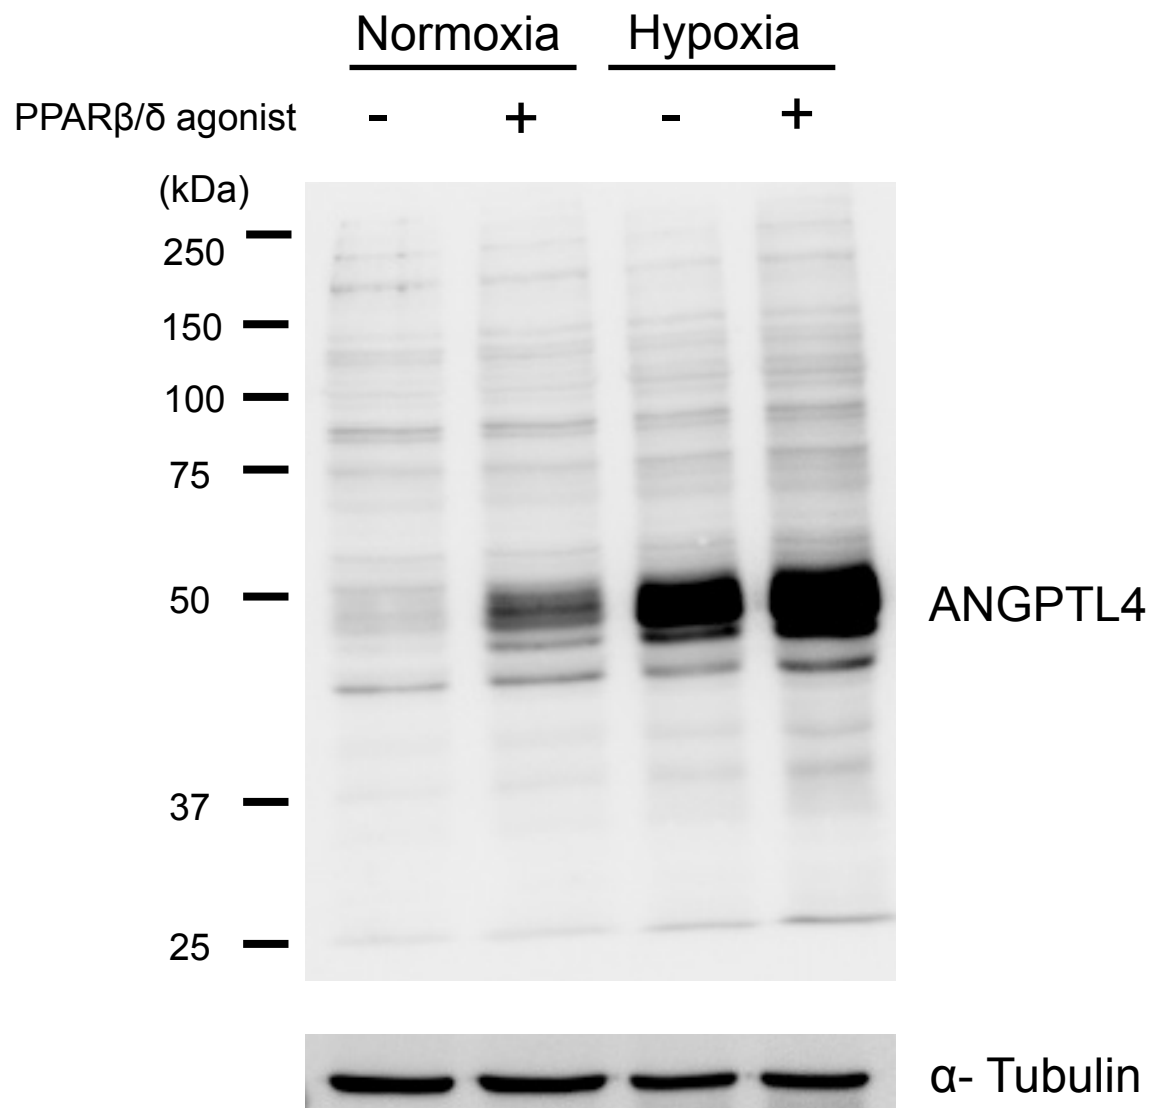

A

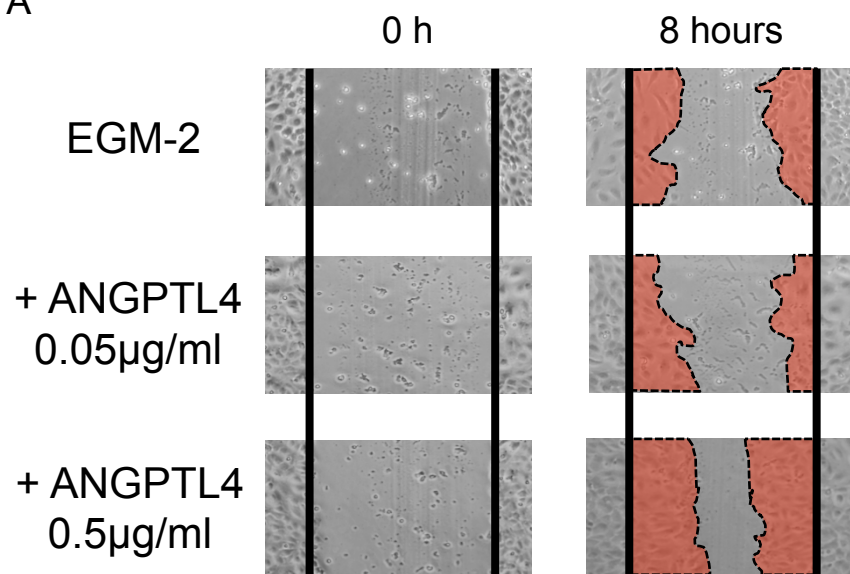

B

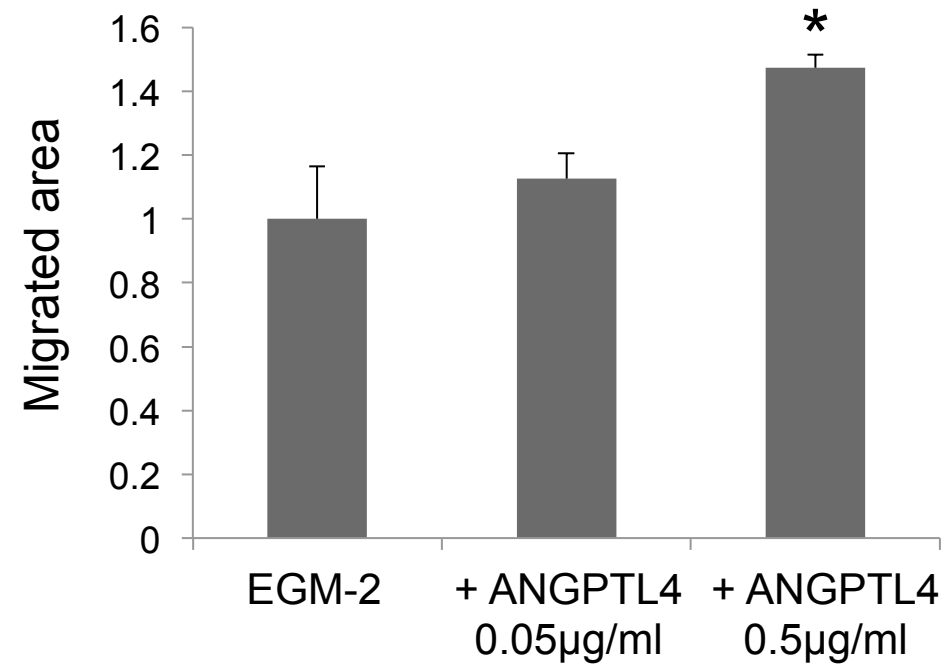

A

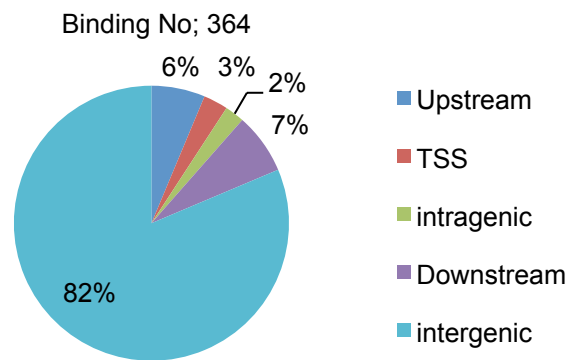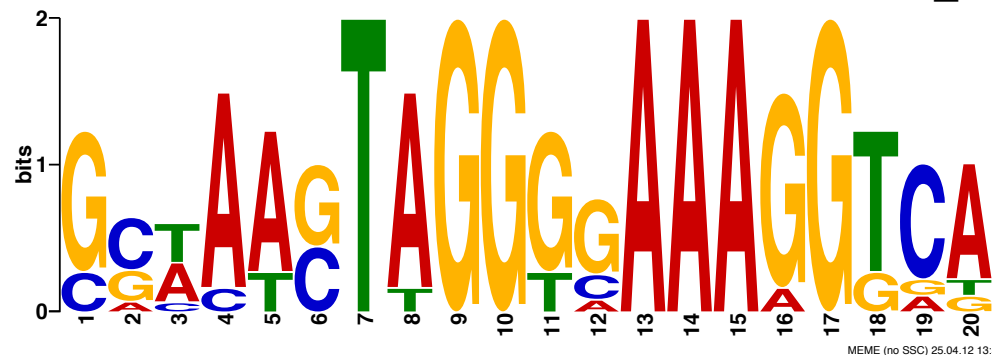

B

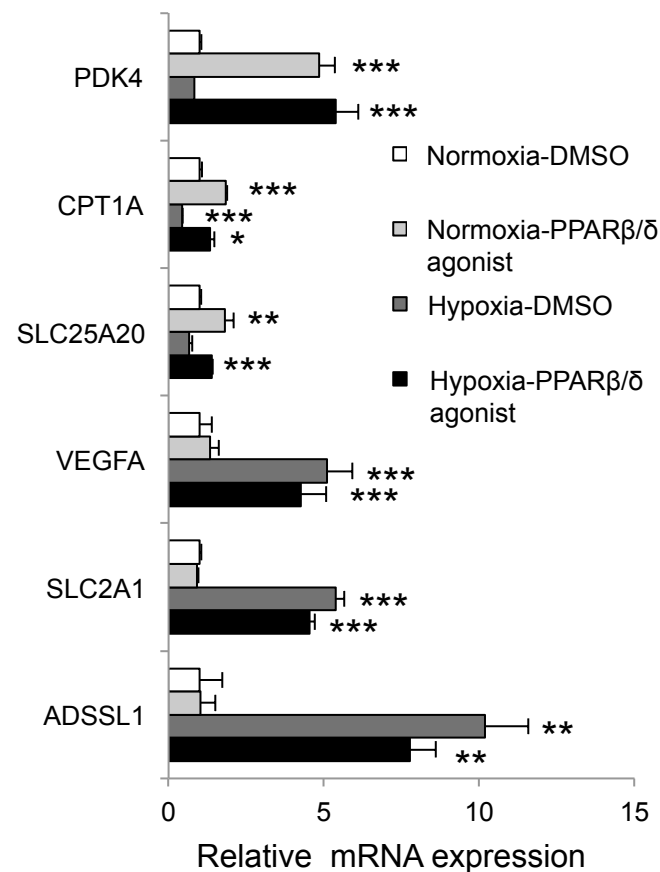

C

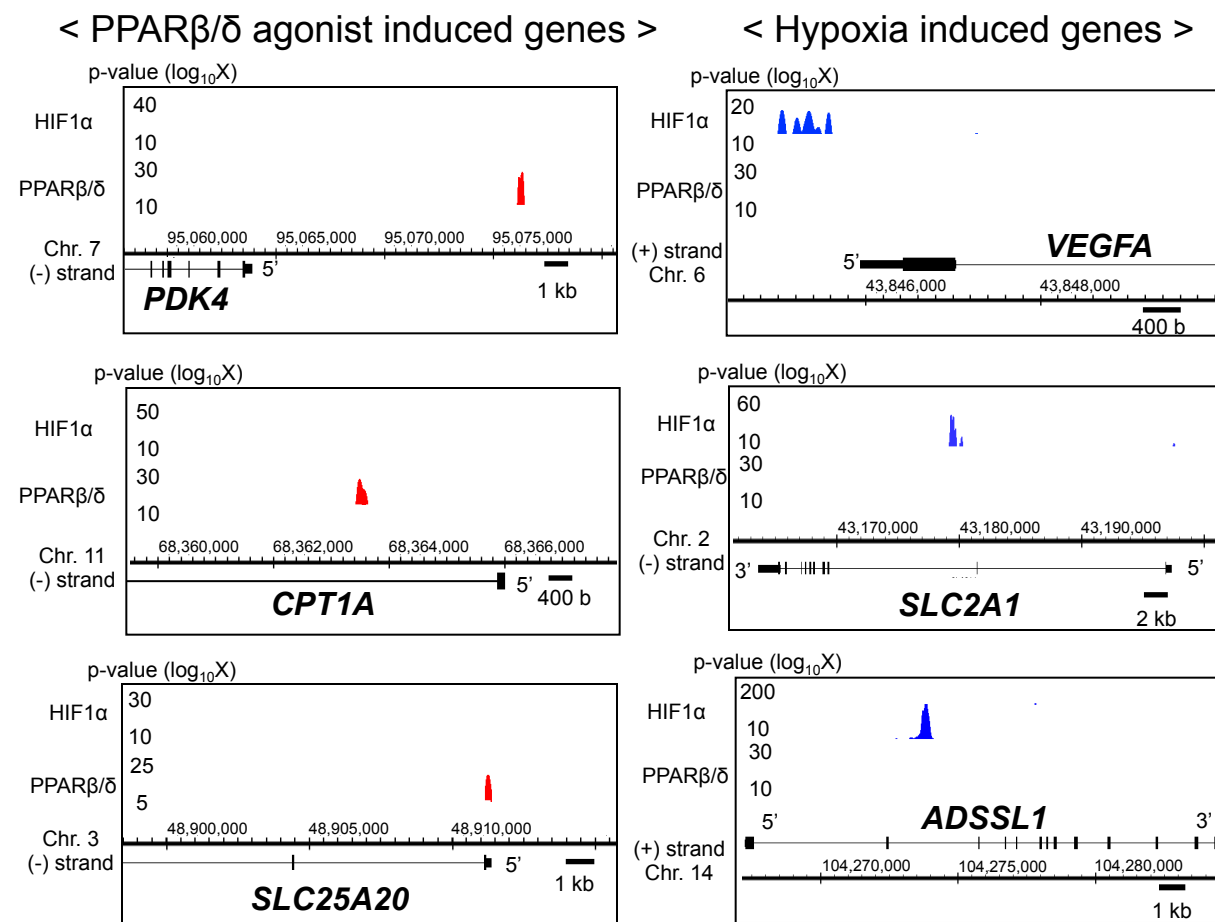

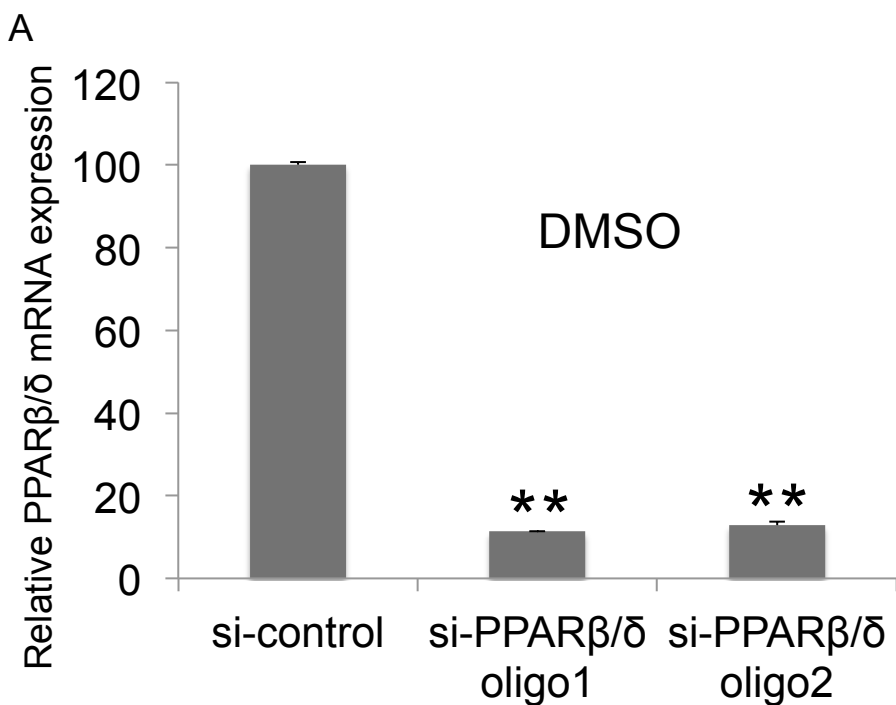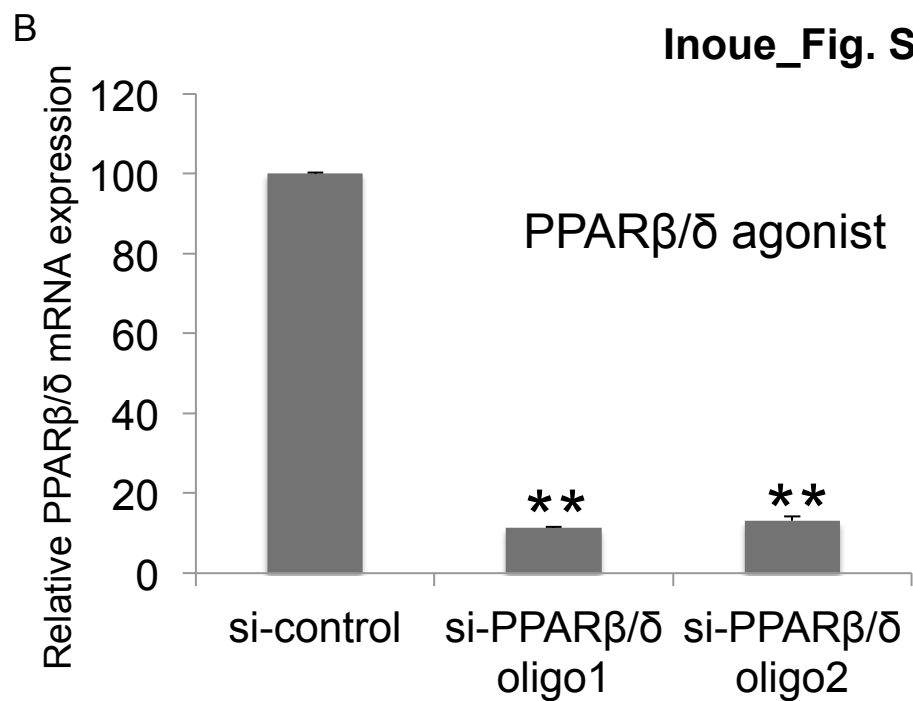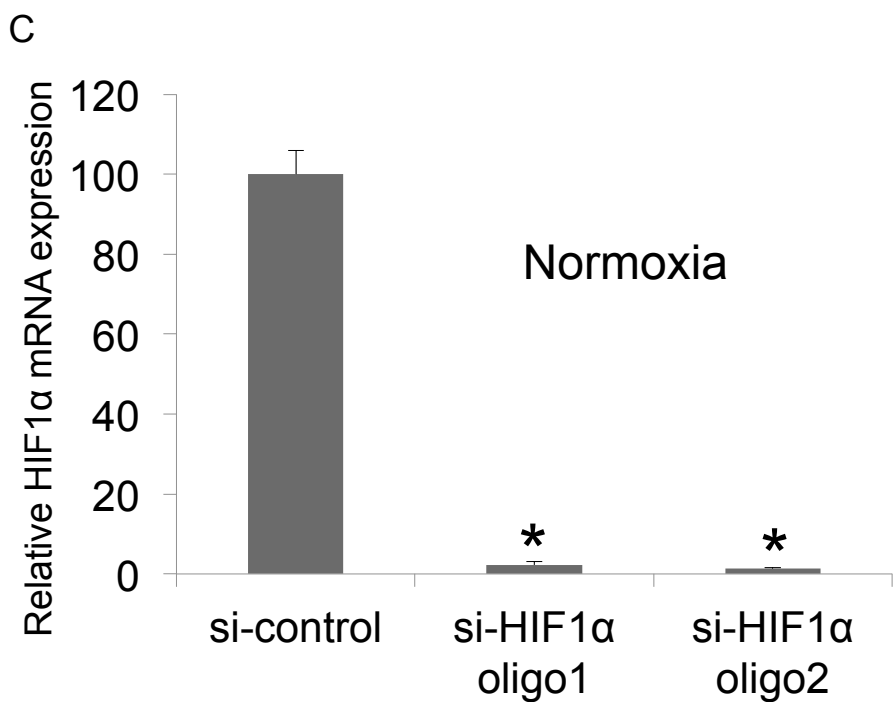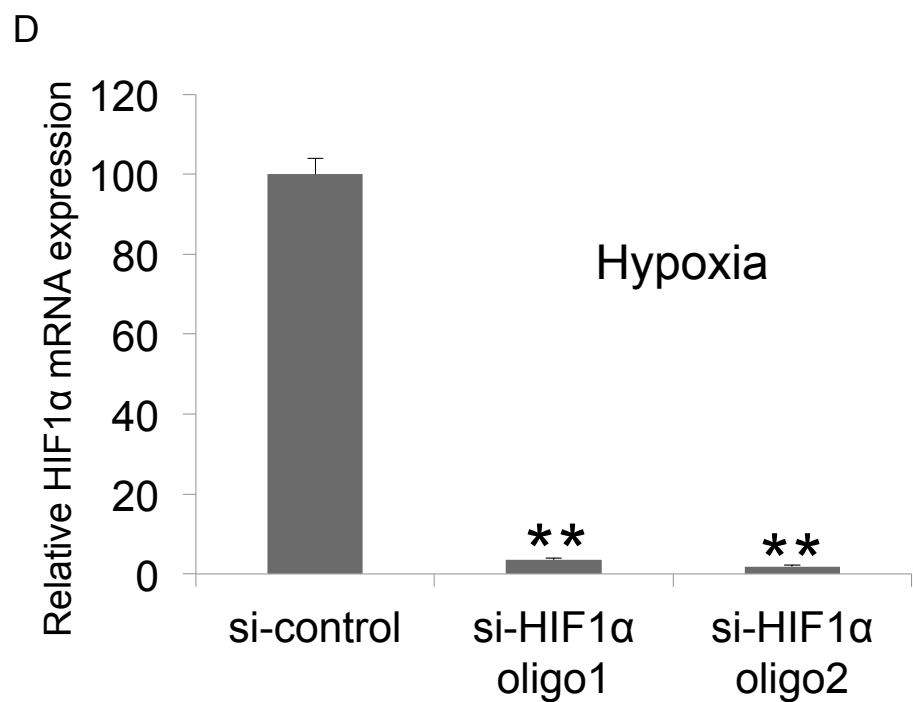



A

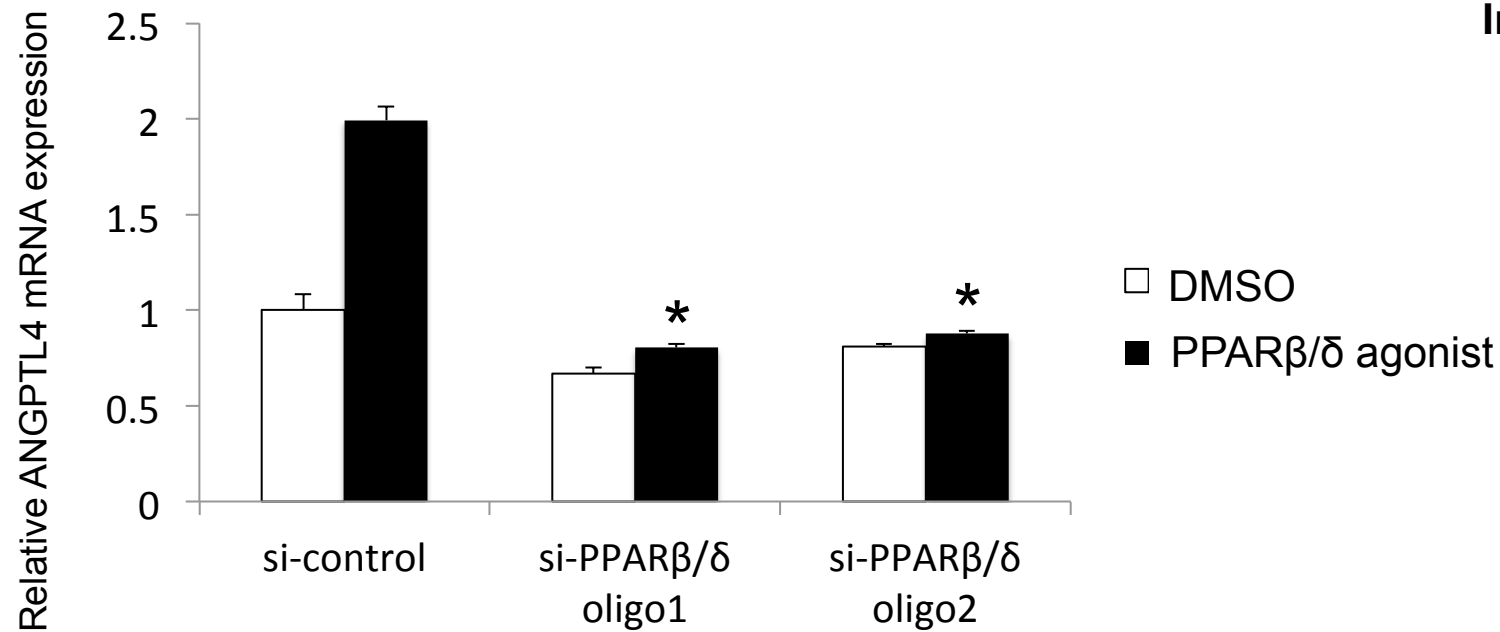

B

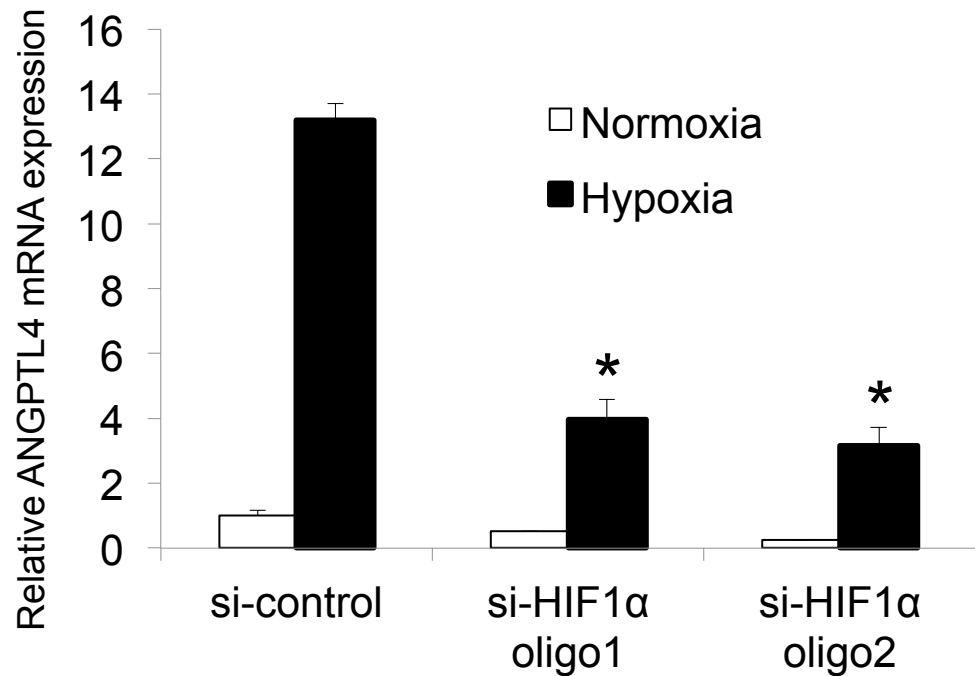

C

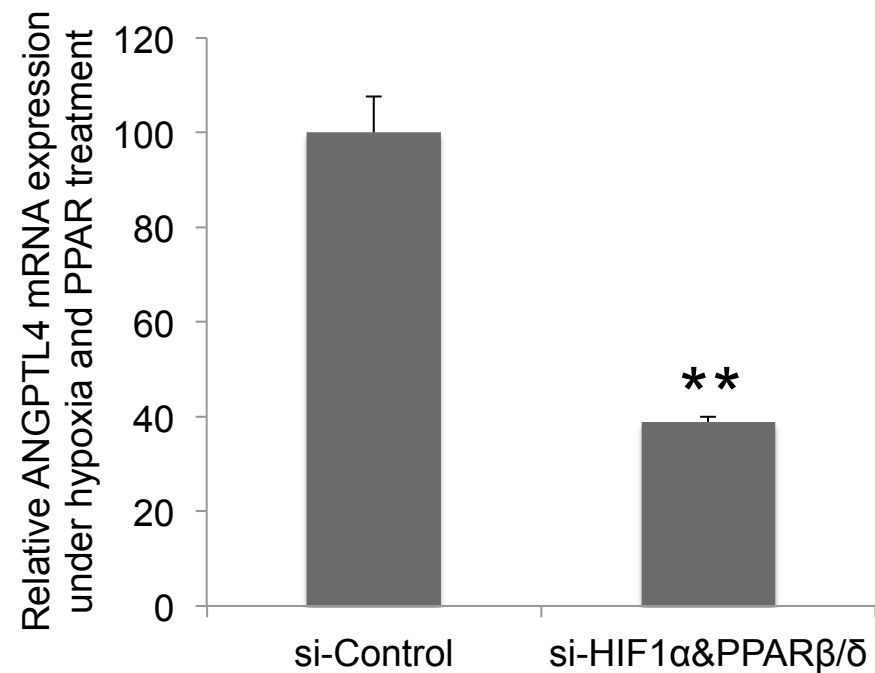

Normoxia + DMSO  
Binding No: 33,221

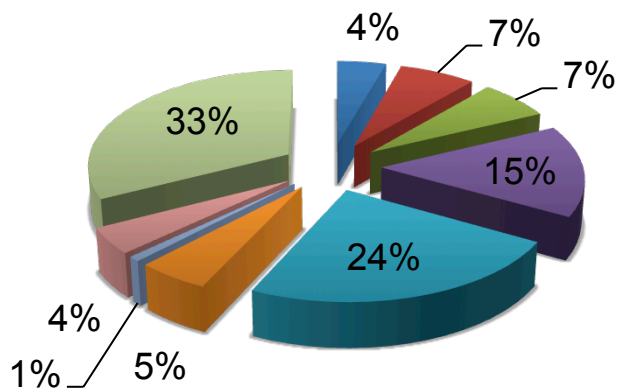

Normoxia + PPAR $\beta/\delta$  agonist  
Binding No; 37,730

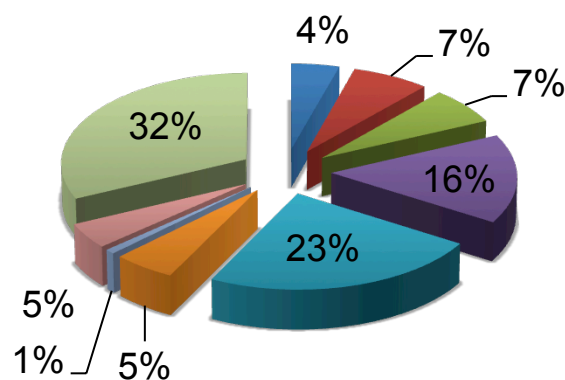

Hypoxia + DMSO  
Binding No; 37,491

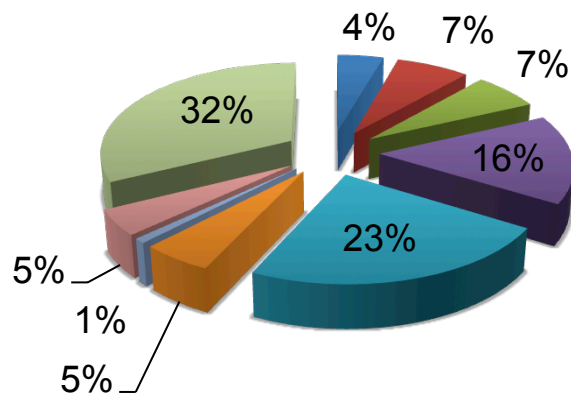

Hypoxia + PPAR $\beta/\delta$  agonist  
Binding No; 37,050

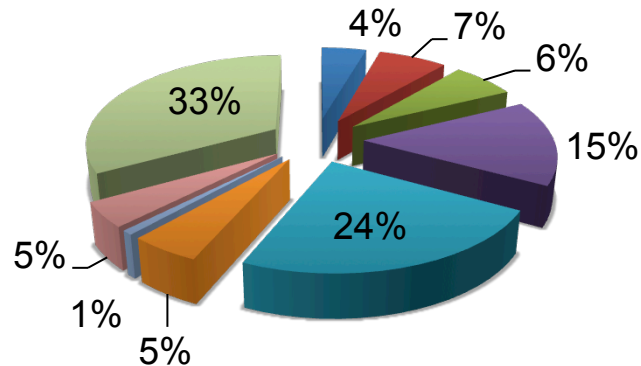

- Upstream
- TSS
- 5'UTR
- first intron
- other introns
- all exons
- 3'UTR
- Downstream
- intergenic

GGGAAGAGGCAGAGGAGATCCCCTCTCACACCCTAGGGTC

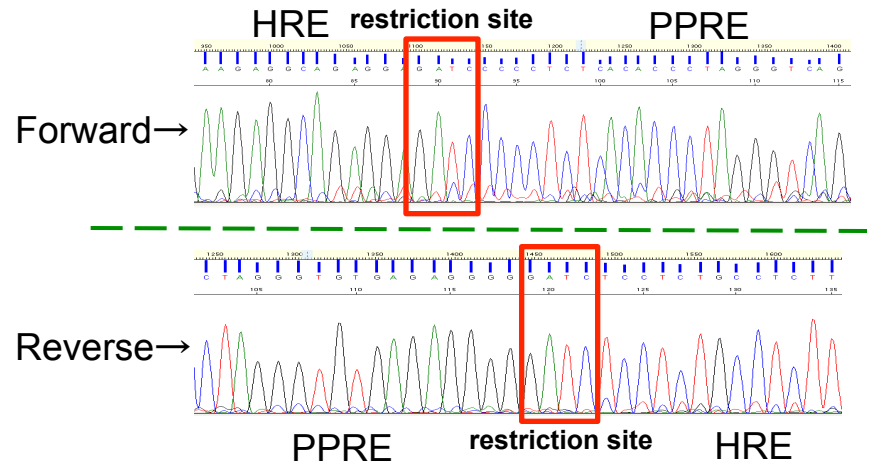

GACCCTAGGGTGTGAGTGGGGATCTCCTCTGCCTCTTCCC

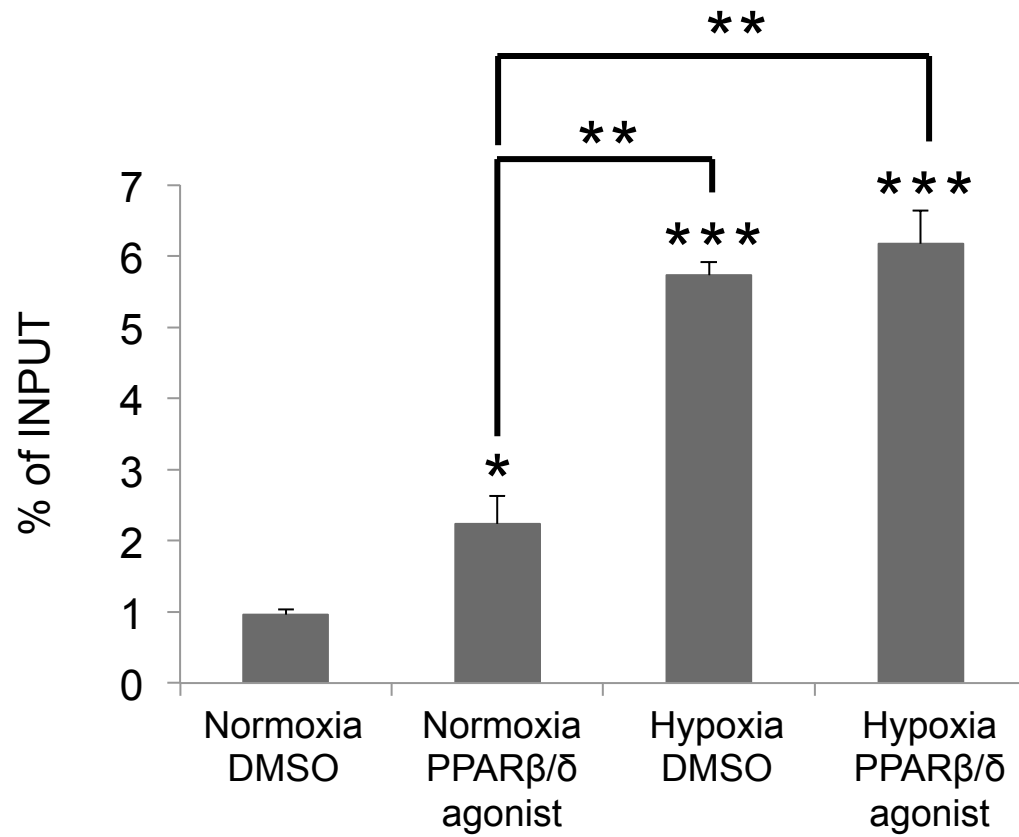

p-value ( $\log_{10}X$ )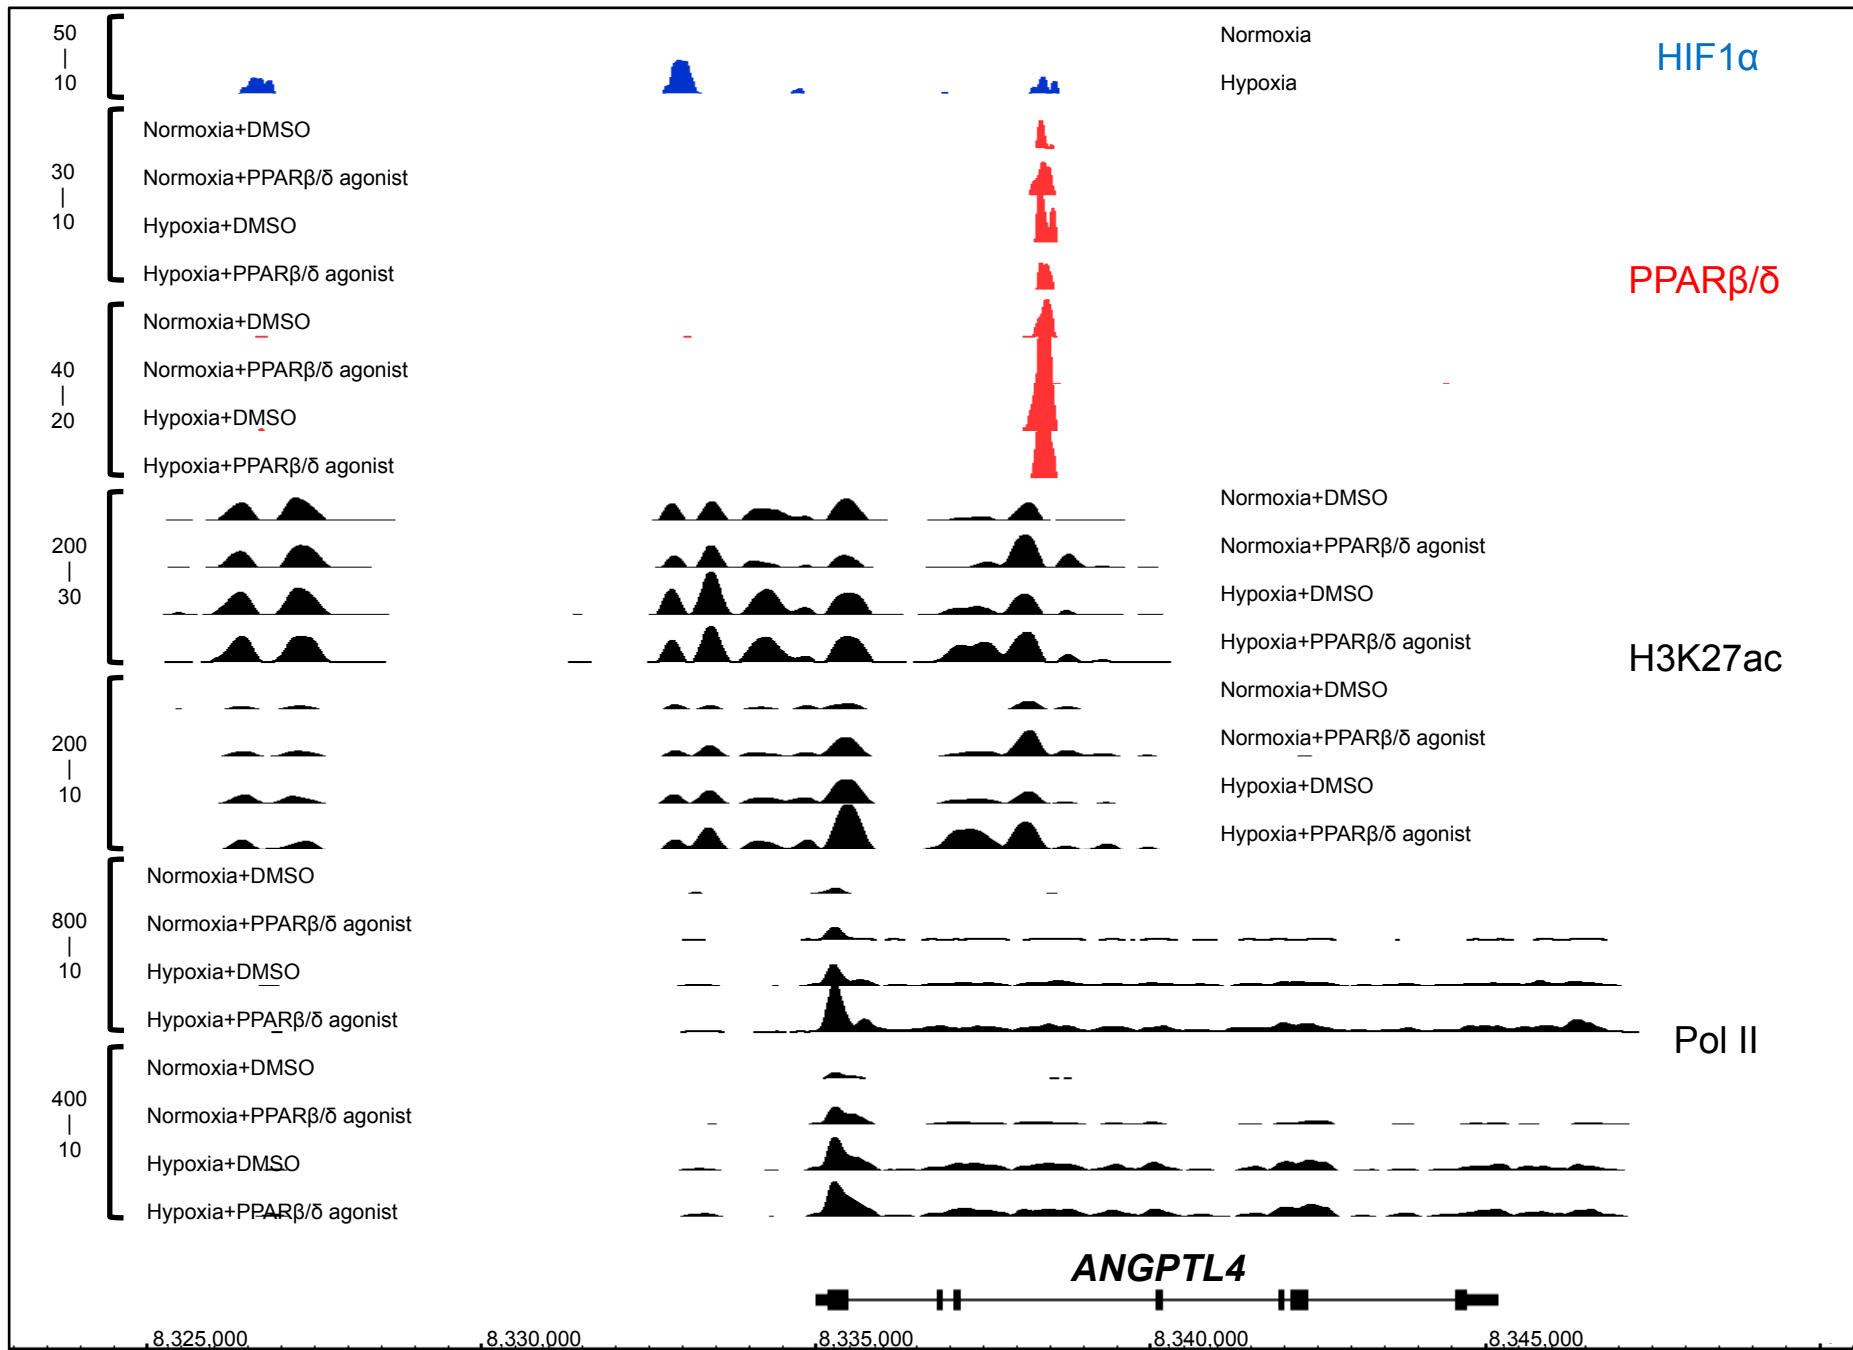

Supplement: gb-2014-15-4-r63-S1.pdf [file gb-2014-15-4-r63-S1.pdf]
