# Supplementary material for: Cross-enhancement of ANGPTL4 transcription by HIF1 alpha and PPAR beta/delta is the result of the conformational proximity of two response elements
Source: PubMed Central journal article supplement (PMC4053749; doi:10.1186/gb-2014-15-4-r63), 2014-04-10
Supplement: gb-2014-15-4-r63-S2.pdf [file gb-2014-15-4-r63-S2.pdf]

**Supplemental Table S1. Common & PPAR $\beta/\delta$  agonist target genes**

| Probe ID                                                                                                         | Entrez Gene | Gene Symbol | Microarray analysis (fold change) |               |                         |
|------------------------------------------------------------------------------------------------------------------|-------------|-------------|-----------------------------------|---------------|-------------------------|
|                                                                                                                  |             |             | With PPAR $\beta/\delta$ agonist  | Under Hypoxia | Under both stimulations |
| Common target genes (The genes induced by the PPAR $\beta/\delta$ agonist and hypoxia)                           |             |             |                                   |               |                         |
| 221009_s_at, 223333_s_at                                                                                         | 51129       | ANGPTL4     | 7.0                               | 20.1          | 35.3                    |
| 225283_at                                                                                                        | 91947       | ARRDC4      | 1.6                               | 2.5           | 2.5                     |
| 227443_at                                                                                                        | 286343      | LURAP1L     | 1.5                               | 1.9           | 2.2                     |
| PPAR $\beta/\delta$ agonist target genes (The genes induced by the PPAR $\beta/\delta$ agonist, but not hypoxia) |             |             |                                   |               |                         |
| 205960_at, 225207_at<br>1562321_at                                                                               | 5166        | PDK4        | 4.1                               | 1.49          | 4.3                     |
| 203633_at, 203634_s_at<br>210687_at, 210688_s_at                                                                 | 1374        | CPT1A       | 2.3                               | -1.1          | 2.0                     |
| 205749_at                                                                                                        | 1543        | CYP1A1      | 2.3                               | -2.1          | 3.3                     |
| 203658_at                                                                                                        | 788         | SLC25A20    | 2.1                               | -1.1          | 1.9                     |
| 209122_at, 215895_x_at                                                                                           | 123         | ADFP        | 1.8                               | 1.3           | 2.1                     |
| 212665_at, 1556829_at                                                                                            | 25976       | TIPARP      | 1.6                               | 1.2           | 2.1                     |

**Supplemental Table S2. Hypoxia target genes**

| Probe ID                                                  | Entrez Gene | Gene Symbol | Under Hypoxia (fold change) | With PPAR $\beta$ / $\delta$ agonist (fold change) | Under both stimulations (fold change) |
|-----------------------------------------------------------|-------------|-------------|-----------------------------|----------------------------------------------------|---------------------------------------|
| 221009_s_at,223333_s_at                                   | 51129       | ANGPTL4     | 20.10903                    | 6.998707                                           | 35.276196                             |
| 204818_at                                                 | 3294        | HSD17B2     | 18.932432                   | -1.2867024                                         | 13.1734                               |
| 208131_s_at,210702_s_at,211892_s_at                       | 5740        | PTGIS       | 15.9720545                  | 1.0815737                                          | 12.081443                             |
| 204347_at,204348_s_at,225342_at,230630_at                 | 205         | AK3L1       | 15.858082                   | 1.1263087                                          | 14.116184                             |
| 228501_at,236361_at,239461_at                             | 117248      | GALNTL2     | 13.51196                    | 1.3196096                                          | 11.324924                             |
| 220613_s_at,225496_s_at,232914_s_at                       | 54843       | SYTL2       | 12.964958                   | 1.370452                                           | 9.967332                              |
| 219888_at                                                 | 6676        | SPAG4       | 12.076656                   | 1.1672696                                          | 12.134428                             |
| 227337_at,242548_x_at                                     | 353322      | ANKRD37     | 10.491178                   | -1.0201494                                         | 8.359237                              |
| 209822_s_at                                               | å           | VLDLR       | 9.754207                    | 1.3684555                                          | 9.247862                              |
| 205330_at                                                 | 4330        | MN1         | 7.648098                    | -1.0045148                                         | 7.219291                              |
| 219014_at                                                 | 51316       | PLAC8       | 7.3558273                   | 1.1268914                                          | 6.039248                              |
| 206023_at                                                 | 10874       | NMU         | 7.153032                    | -1.2117007                                         | 5.9229097                             |
| 201249_at,201250_s_at                                     | 6513        | SLC2A1      | 6.5150785                   | -1.0630188                                         | 5.0163207                             |
| 226415_at                                                 | 57687       | VAT1L       | 6.016297                    | -1.0552046                                         | 5.2956805                             |
| 202912_at                                                 | 133         | ADM         | 5.742194                    | 1.1007686                                          | 5.0649753                             |
| 231798_at                                                 | 9241        | NOG         | 5.5532675                   | 1.0385559                                          | 5.260714                              |
| 219410_at                                                 | 55076       | TMEM45A     | 5.413069                    | 1.1743897                                          | 5.3599772                             |
| 213338_at                                                 | 25907       | TMEM158     | 5.0977197                   | -1.0890547                                         | 4.505342                              |
| 227488_at,228235_at,229784_at                             | 84848       | MGC16121    | 5.017606                    | 1.0444225                                          | 4.476229                              |
| 201313_at                                                 | 2026        | ENO2        | 4.9443874                   | -1.1037586                                         | 4.681068                              |
| 205013_s_at                                               | 135         | ADORA2A     | 4.902788                    | 1.0262256                                          | 3.493641                              |
| 221272_s_at,223125_s_at,223126_s_at,223127_s_at,237098_at | 81563       | C1orf21     | 4.6748276                   | 1.076107                                           | 4.1597204                             |
| 202022_at                                                 | 230         | ALDOC       | 4.576794                    | -1.0135684                                         | 4.2470136                             |
| 224797_at                                                 | 57561       | ARRDC3      | 4.5106773                   | -1.035341                                          | 6.1319313                             |
| 202364_at                                                 | 4601        | MXI1        | 4.500933                    | 1.0816774                                          | 3.7139523                             |
| 224657_at                                                 | 54206       | ERRFI1      | 4.4689636                   | 1.0278349                                          | 3.8591936                             |
| 202887_s_at                                               | 54541       | DDIT4       | 4.4260054                   | -1.2394512                                         | 3.9378142                             |

|                                                                   |        |                  |           |            |           |
|-------------------------------------------------------------------|--------|------------------|-----------|------------|-----------|
| 204298_s_at,213640_s_at,215446_s_at                               | 4015   | LOX              | 4.366602  | -1.0497099 | 3.727407  |
| 213942_at,226869_at                                               | 1953   | MEGF6            | 4.3172774 | 1.1134712  | 3.6299882 |
| 226325_at,238259_at                                               | 122622 | ADSSL1           | 4.2958794 | 1.0620162  | 3.7998059 |
| 201506_at                                                         | 7045   | TGFBI            | 4.294224  | 1.0306468  | 3.1867814 |
| 204595_s_at,204596_s_at,204597_x_at                               | 6781   | STC1             | 4.216043  | 1.3428713  | 4.1274953 |
| 204239_s_at                                                       | 4826   | NNAT             | 4.121432  | 1.0805768  | 2.8460157 |
| 201008_s_at,201009_s_at,201010_s_at                               | 10628  | TXNIP            | 4.0431147 | -1.0351532 | 3.542655  |
| 1559034_at                                                        | 284759 | SIRPB2           | 3.9883773 | -1.1183425 | 4.5273523 |
| 207543_s_at,243335_at                                             | 5033   | P4HA1            | 3.917186  | 1.049873   | 3.6096933 |
| 214978_s_at                                                       | 8497   | PPFIA4           | 3.900043  | -1.2310604 | 5.1829367 |
| 201968_s_at                                                       | 5236   | PGM1             | 3.8619025 | 1.0797421  | 3.7957754 |
| 204790_at                                                         | 4092   | SMAD7            | 3.85889   | -1.0582205 | 3.1265576 |
| 213715_s_at                                                       | 256949 | KANK3            | 3.7383533 | 1.299243   | 3.5162156 |
| 218541_s_at                                                       | 56892  | C8orf4           | 3.7312787 | -1.0198231 | 3.9656029 |
| 202497_x_at,202498_s_at,202499_s_at,216236_s_at,222088_s_at       | 6515   | SLC2A3///SLC2A14 | 3.7133472 | -1.0656692 | 3.134845  |
| 209201_x_at,211919_s_at,217028_at                                 | 7852   | CXCR4            | 3.7048063 | 1.1289425  | 3.165013  |
| 200632_s_at                                                       | 10397  | NDRG1            | 3.5996413 | -1.0141298 | 2.9991639 |
| 204926_at,210511_s_at                                             | 3624   | INHBA            | 3.5783617 | 1.0507447  | 2.880707  |
| 205920_at,205921_s_at,211030_s_at,228754_at,228756_at             | 6533   | SLC6A6           | 3.5425673 | -1.0106163 | 3.222889  |
| 216236_s_at,222088_s_at                                           | 144195 | SLC2A3///SLC2A14 | 3.5091033 | 1.0078244  | 2.8309    |
| 232504_at                                                         | 285628 | LOC285628        | 3.4528813 | -1.03641   | 3.2175832 |
| 221578_at,49306_at,226436_at,237294_at                            | 83937  | RASSF4           | 3.4363368 | -1.0020229 | 3.1121616 |
| 203953_s_at,203954_x_at                                           | 1365   | CLDN3            | 3.344086  | -1.1825979 | 2.8395362 |
| 201848_s_at,201849_at                                             | 664    | BNIP3            | 3.2841182 | 1.0305194  | 3.7509923 |
| 210512_s_at,210513_s_at,211527_x_at,212171_x_at                   | 7422   | VEGFA            | 3.2560515 | 1.059625   | 3.0206482 |
| 209795_at                                                         | 969    | CD69             | 3.2351506 | 1.2784197  | 2.019427  |
| 204284_at,240187_at                                               | 5507   | PPP1R3C          | 3.2231414 | 1.0481321  | 2.5696115 |
| 207255_at,209894_at,211354_s_at,211355_x_at,211356_x_at,1556919_a | 3953   | LEPR             | 3.2162414 | 1.1283901  | 3.0903177 |
| 218849_s_at                                                       | 10848  | PPP1R13L         | 3.15144   | 1.0277561  | 2.8661413 |
| 223276_at                                                         | 85027  | MST150           | 3.1432748 | 1.0138717  | 2.1463187 |
| 212689_s_at,242758_x_at                                           | 55818  | KDM3A            | 3.1113708 | 1.0020725  | 3.193421  |

|                                                                         |        |                 |           |            |           |
|-------------------------------------------------------------------------|--------|-----------------|-----------|------------|-----------|
| 219702_at                                                               | 10761  | PLAC1           | 3.1000793 | 1.1821946  | 2.2554028 |
| 202796_at,235128_at,235914_at                                           | 11346  | SYNPO           | 3.0607767 | -1.0115477 | 2.4617748 |
| 221031_s_at                                                             | 81575  | APOLD1          | 3.0205743 | 1.1764495  | 2.8127327 |
| 219232_s_at,222847_s_at                                                 | 112399 | EGLN3           | 3.019163  | 1.0871795  | 2.35681   |
| 202733_at                                                               | 8974   | P4HA2           | 3.0142086 | -1.0027268 | 2.751664  |
| 204881_s_at,221765_at,224967_at                                         | 7357   | UGCG            | 2.998255  | -1.0145199 | 2.6139965 |
| 201169_s_at,201170_s_at                                                 | 8553   | BHLHE40         | 2.965117  | -1.0116216 | 2.593799  |
| 201147_s_at,201148_s_at,201149_s_at,201150_s_at                         | 7078   | TIMP3           | 2.9071414 | -1.0830353 | 2.3944306 |
| 228362_s_at,229390_at,229391_s_at,229543_at,229915_at                   | 441168 | FAM26F          | 2.8846965 | 1.1309612  | 2.5181847 |
| 220388_at,222245_s_at                                                   | 80307  | FER1L4          | 2.8095615 | 1.1387254  | 3.1754975 |
| 228770_at                                                               | 115330 | GPR146          | 2.7955272 | -1.0950174 | 2.4899452 |
| 221478_at,221479_s_at                                                   | 665    | BNIP3L          | 2.791297  | 1.0345457  | 2.8819861 |
| 233565_s_at                                                             | 27111  | SDCBP2          | 2.7470639 | 1.096678   | 2.621835  |
| 210715_s_at                                                             | 10653  | SPINT2          | 2.7400997 | 1.0381677  | 2.3365803 |
| 201041_s_at,201044_x_at                                                 | 1843   | DUSP1           | 2.739735  | 1.062241   | 2.3276436 |
| 203973_s_at,213003_s_at,213006_at                                       | 1052   | CEBPD           | 2.7347922 | 1.0870358  | 2.3310966 |
| 203066_at                                                               | 51363  | GALNAC4S-6ST    | 2.709463  | 1.2635218  | 3.0513194 |
| 213900_at                                                               | 9413   | C9orf61         | 2.7082953 | 1.0218042  | 2.0367332 |
| 207574_s_at,209304_x_at,209305_s_at,213560_at                           | 4616   | GADD45B         | 2.6910226 | -1.0672487 | 2.2442837 |
| 227868_at                                                               | 154761 | LOC154761       | 2.6862133 | -1.016597  | 2.1748219 |
| 202023_at                                                               | 1942   | EFNA1           | 2.672577  | -1.134444  | 2.140025  |
| 218149_s_at,221123_x_at,222536_s_at,223216_x_at,232693_s_at,232694_s_at | 55893  | FBXO16///ZNF395 | 2.6613812 | -1.0005155 | 2.4505234 |
| 227481_at,242394_at                                                     | 154043 | CNKSr3          | 2.6547613 | -1.1260433 | 2.0106716 |
| 221011_s_at                                                             | 81606  | LBH             | 2.6483796 | -1.0430537 | 1.8323219 |
| 218863_s_at,218864_at,221246_x_at,221747_at,221748_s_at,232750_at       | 7145   | TNS1            | 2.6409469 | 1.0196899  | 2.4974587 |
| 209946_at                                                               | 7424   | VEGFC           | 2.6380374 | -1.1224189 | 2.2622871 |
| 208510_s_at                                                             | 5468   | PPARG           | 2.632619  | -1.0869524 | 1.3990397 |
| 208891_at,208892_s_at,208893_s_at                                       | 1848   | DUSP6           | 2.6288686 | -1.0732999 | 3.0172298 |
| 223672_at                                                               | 84251  | SGIP1           | 2.6123674 | -1.0434889 | 2.89288   |
| 208461_at,230218_at                                                     | 3090   | HIC1            | 2.6072962 | 1.0544306  | 1.8571677 |
| 206633_at,211039_at                                                     | 1134   | CHRNA1          | 2.6072748 | -1.0815752 | 2.1196766 |

|                                                                     |        |           |           |            |           |
|---------------------------------------------------------------------|--------|-----------|-----------|------------|-----------|
| 203835_at                                                           | 2615   | LRRC32    | 2.5887058 | -1.0504373 | 2.418337  |
| 202855_s_at,202856_s_at,213522_s_at,217685_at,217691_x_at           | 9123   | SLC16A3   | 2.575064  | -1.0763892 | 2.6620975 |
| 206084_at,210675_s_at                                               | 5801   | PTPRR     | 2.5745492 | 1.1081775  | 1.734538  |
| 228564_at                                                           | 375295 | LOC375295 | 2.5697331 | 1.0214471  | 2.6363823 |
| 213280_at                                                           | 23108  | GARNL4    | 2.5377605 | 1.4615843  | 1.9120365 |
| 209821_at                                                           | 90865  | IL33      | 2.527802  | 1.0623894  | 1.6323873 |
| 206211_at                                                           | 6401   | SELE      | 2.525342  | 1.4597855  | 1.807039  |
| 205158_at,213397_x_at                                               | 6038   | RNASE4    | 2.5219579 | 1.0859808  | 2.4892704 |
| 208214_at,229277_at,229309_at                                       | 153    | ADRB1     | 2.5138063 | 1.1400461  | 2.536407  |
| 227307_at,228819_at,1561449_at                                      | 90139  | TSPAN18   | 2.5015595 | -1.2474855 | 1.7461693 |
| 209493_at,233025_at,233026_s_at                                     | 23037  | PDZD2     | 2.4981704 | 1.1128467  | 1.9936345 |
| 203417_at                                                           | 4237   | MFAP2     | 2.4730103 | -1.105154  | 2.224367  |
| 225283_at                                                           | 91947  | ARRDC4    | 2.4702792 | 1.5583578  | 2.5006428 |
| 223315_at                                                           | 59277  | NTN4      | 2.4509566 | 1.0857127  | 3.1736004 |
| 219319_at,222123_s_at,222124_at,232669_at,233517_s_at,1555318_at,1. | 64344  | HIF3A     | 2.4327266 | 1.0901693  | 2.4273324 |
| 220108_at,243580_at                                                 | 9630   | GNA14     | 2.4255335 | -1.0085351 | 1.6824194 |
| 213996_at,228296_at,228788_at                                       | 29799  | YPEL1     | 2.4243898 | 1.0182933  | 2.1329432 |
| 236915_at,237585_at                                                 | 441054 | C4orf47   | 2.4220521 | 1.4357066  | 2.383356  |
| 218162_at                                                           | 56944  | OLFML3    | 2.411359  | 1.0546969  | 1.9682903 |
| 235953_at                                                           | 162963 | ZNF610    | 2.4097505 | 1.0694715  | 2.0069046 |
| 1553635_s_at                                                        | 200132 | TCTEX1D1  | 2.391177  | -1.0019665 | 2.0252175 |
| 220092_s_at,220093_at,224694_at,227660_at,234430_at,234832_at       | 84168  | ANTXR1    | 2.3854177 | 1.0140164  | 2.203451  |
| 202972_s_at,202973_x_at,217047_s_at,1569024_at,1569025_s_at         | 10144  | FAM13A    | 2.3677855 | 1.0863153  | 2.238961  |
| 203859_s_at                                                         | 5064   | PALM      | 2.3641858 | 1.0920115  | 2.0960515 |
| 205846_at,217177_s_at,230250_at,1560105_at                          | 5787   | PTPRB     | 2.359804  | 1.0544599  | 2.5497692 |
| 204135_at,1554965_at,1554966_a_at                                   | 11259  | FILIP1L   | 2.3380134 | -1.0937941 | 2.0470176 |
| 219862_s_at                                                         | 26502  | NARF      | 2.33565   | -1.0587037 | 2.1874118 |
| 205554_s_at,1561336_at                                              | 1776   | DNASE1L3  | 2.3310173 | 1.206035   | 1.8233258 |
| 209774_x_at,230101_at,1569203_at                                    | 2920   | CXCL2     | 2.3308785 | -1.3441355 | 1.7987003 |
| 227263_at,236296_x_at                                               | 541565 | C8orf58   | 2.3261378 | 1.0424777  | 1.8719829 |
| 207196_s_at,243423_at                                               | 10318  | TNIP1     | 2.3091512 | -1.1153599 | 2.2248285 |

|                                                                    |           |                 |           |            |           |
|--------------------------------------------------------------------|-----------|-----------------|-----------|------------|-----------|
| 206246_at,228499_at                                                | 5210      | PFKFB4          | 2.3066256 | -1.2963716 | 2.205529  |
| 243337_at                                                          | 166752    | FREM3           | 2.2856097 | -1.133587  | 1.1894583 |
| 202643_s_at,202644_s_at                                            | 7128      | TNFAIP3         | 2.274235  | 1.1366693  | 2.1153088 |
| 228427_at,232693_s_at                                              | 157574    | FBXO16///ZNF395 | 2.268759  | -1.1465316 | 2.149984  |
| 217867_x_at,222446_s_at                                            | 25825     | BACE2           | 2.2680182 | 1.0146326  | 1.819841  |
| 238429_at                                                          | 137835    | TMEM71          | 2.2621398 | 1.2234018  | 2.264053  |
| 222662_at,1552669_at,1552670_a_at                                  | 79660     | PPP1R3B         | 2.2617211 | 1.0282257  | 2.077569  |
| 203325_s_at,212488_at,212489_at                                    | 1289      | COL5A1          | 2.2615478 | 1.0658569  | 2.1075532 |
| 205974_at,205975_s_at                                              | 3231      | HOXD1           | 2.2598553 | 1.0077931  | 1.9462303 |
| 203592_s_at                                                        | 10272     | FSTL3           | 2.2553558 | 1.0659888  | 1.6256529 |
| 211518_s_at                                                        | 652       | BMP4            | 2.24237   | -1.0056616 | 2.0314214 |
| 221221_s_at,1555110_a_at                                           | 26249     | KLHL3           | 2.2348135 | 1.1348771  | 2.271526  |
| 227151_at                                                          | 257364    | SNX33           | 2.2322192 | 1.1520879  | 1.8624104 |
| 213349_at,213351_s_at,213352_at,227112_at                          | 23023     | TMCC1           | 2.207695  | 1.0208389  | 2.026031  |
| 235548_at                                                          | 164284    | APCDD1L         | 2.1963515 | 1.1245165  | 2.0158021 |
| 1555366_at                                                         | 100131275 | NSAP11          | 2.1921139 | -1.1967434 | 1.8107357 |
| 220942_x_at,221533_at,223193_x_at,224345_x_at                      | 26355     | FAM162A         | 2.1745884 | 1.0496544  | 2.215231  |
| 225803_at,241762_at,241763_s_at                                    | 114907    | FBXO32          | 2.1691191 | -1.2190872 | 1.7193284 |
| 219165_at,232302_at                                                | 64236     | PDLIM2          | 2.1648476 | -1.0689782 | 1.9526    |
| 219049_at                                                          | 55790     | CSGALNACT1      | 2.162727  | -1.0311981 | 1.610716  |
| 216598_s_at                                                        | 6347      | CCL2            | 2.1600096 | -1.0595535 | 1.8255678 |
| 204288_s_at,220858_at,225728_at,233720_at,237285_at,1555472_at,155 | 8470      | SORBS2          | 2.1583967 | -1.0879725 | 1.890009  |
| 223423_at                                                          | 26996     | GPR160          | 2.1523507 | 1.4074777  | 1.511825  |
| 204906_at,212912_at,1557970_s_at                                   | 6196      | RPS6KA2         | 2.149721  | -1.0137899 | 1.818362  |
| 207547_s_at,209074_s_at                                            | 11170     | FAM107A         | 2.1425042 | 1.0596012  | 2.0806036 |
| 209908_s_at,209909_s_at,220406_at,220407_s_at,228121_at            | 7042      | TGFB2           | 2.131523  | -1.0832423 | 2.0179913 |
| 221497_x_at,223045_at,223046_at,224314_s_at                        | 54583     | EGLN1           | 2.1310742 | -1.0906855 | 1.9458026 |
| 203758_at                                                          | 1519      | CTSO            | 2.1273916 | -1.0197392 | 1.7217008 |
| 207174_at                                                          | 2262      | GPC5            | 2.1257377 | -1.1293306 | 1.6161052 |
| 201032_at                                                          | 10904     | BLCAP           | 2.1253934 | -1.0865993 | 1.8260674 |
| 205141_at                                                          | 283       | ANG             | 2.1212332 | 1.3270131  | 2.0240164 |

|                                                      |           |                   |           |            |           |
|------------------------------------------------------|-----------|-------------------|-----------|------------|-----------|
| 225955_at                                            | 284207    | METRNL//LOC653506 | 2.1209793 | -1.1133599 | 1.5940164 |
| 225955_at                                            | 653506    | METRNL//LOC653506 | 2.1209793 | -1.1133599 | 1.5940164 |
| 224602_at,224604_at,224605_at                        | 401152    | C4orf3            | 2.1202826 | -1.0400119 | 2.299671  |
| 229872_s_at                                          | 100132999 | LOC100132999      | 2.119753  | 1.0120751  | 1.5495505 |
| 203504_s_at,203505_at,216066_at,1570279_at           | 19        | ABCA1             | 2.1100938 | 1.2356447  | 2.3568194 |
| 206750_at,226206_at                                  | 7975      | MAFK              | 2.1041422 | -1.032114  | 1.897115  |
| 220765_s_at                                          | 55679     | LIMS2             | 2.1037471 | 1.0523642  | 1.7651325 |
| 232090_at,235891_at                                  | 100128178 | LOC100128178      | 2.1018226 | -1.0440995 | 2.1785946 |
| 206039_at                                            | 9363      | RAB33A            | 2.1001346 | -1.0072429 | 1.5192027 |
| 202403_s_at,202404_s_at,229218_at                    | 1278      | COL1A2            | 2.0951462 | -1.1576678 | 1.9340343 |
| 230800_at                                            | 196883    | ADCY4             | 2.0943985 | -1.0339007 | 1.875875  |
| 225956_at,225957_at,238476_at,1554229_at             | 153222    | C5orf41           | 2.0924127 | 1.0739126  | 1.9774675 |
| 202331_at                                            | 593       | BCKDHA            | 2.086277  | 1.0938169  | 1.8832657 |
| 227285_at                                            | 148523    | C1orf51           | 2.085083  | -1.1474195 | 2.6896985 |
| 221016_s_at                                          | 83439     | TCF7L1            | 2.0803952 | 1.0203443  | 1.6747903 |
| 203438_at,203439_s_at                                | 8614      | STC2              | 2.0640998 | 1.293725   | 2.1740055 |
| 218723_s_at,228193_s_at,239827_at                    | 28984     | C13orf15          | 2.061145  | -1.0670787 | 1.6759852 |
| 220753_s_at                                          | 51084     | CRYL1             | 2.0590684 | 1.0620204  | 2.0383368 |
| 209034_at                                            | 10957     | PNRC1             | 2.0540316 | 1.0597006  | 1.8538456 |
| 203824_at                                            | 7103      | TSPAN8            | 2.050393  | 1.3287568  | 2.1017601 |
| 212358_at,235243_at                                  | 25999     | CLIP3             | 2.0453627 | 1.0572242  | 1.8384871 |
| 224647_at,224649_x_at,224651_at,224652_at,1554694_at | 219771    | CCNY              | 2.0426536 | -1.048578  | 1.8834214 |
| 201473_at                                            | 3726      | JUNB              | 2.041329  | 1.0165668  | 1.8109099 |
| 202149_at,202150_s_at,1569020_at                     | 4739      | NEDD9             | 2.0344055 | -1.0132056 | 2.1341426 |
| 225898_at                                            | 84058     | WDR54             | 2.032354  | 1.0555876  | 2.0671153 |
| 238865_at                                            | 132430    | PABPC4L           | 2.0269117 | 1.1380436  | 1.8523573 |
| 231868_at                                            | 57594     | HOMEZ             | 2.0247905 | 1.0693351  | 1.5284432 |
| 221211_s_at                                          | 56911     | C21orf7           | 2.0194871 | 1.0919338  | 1.7180967 |
| 220111_s_at,234718_at                                | 57101     | ANO2              | 2.0129318 | 1.2785292  | 2.040816  |
| 229523_at,238128_at                                  | 645369    | TTMA              | 2.011496  | 1.1876391  | 1.6046479 |
| 214719_at                                            | 283537    | SLC46A3           | 2.0113132 | -1.3414589 | 1.1275975 |

|                               |      |          |           |            |           |
|-------------------------------|------|----------|-----------|------------|-----------|
| 205150_s_at,205151_s_at       | 9865 | KIAA0644 | 2.0057852 | 1.2285626  | 1.486554  |
| 212154_at,212157_at,212158_at | 6383 | SDC2     | 2.005355  | -1.0155405 | 1.6271296 |

---



**Supplemental Table S3A. Primers list for expression analysis**

---

|                                    |                               |
|------------------------------------|-------------------------------|
| ANGPTL4fw                          | GCAGGATCCAGCAACTCTTC          |
| ANGPTL4rv                          | AAACTGGCTTTGCAGATGCT          |
| HIF1 $\alpha$ fw                   | CGAGATGCAGCCAGATCTCGGCCAAGTAA |
| HIF1 $\alpha$ rv                   | CTCTCATTTCCTCATGGTCACATGGATG  |
| PPAR $\beta$ / $\delta$ fw         | TCATTGCGGCCATCATTCTGTGTG      |
| PPAR $\beta$ / $\delta$ rv         | TTCGGTCTTCTTGATCCGCTGCAT      |
| PDK4fw                             | TGCAATTGGTTAAAAGCTGGT         |
| PDK4rv                             | CATCTGGGCTTTTCTCATGG          |
| CPT1Afw                            | ACAGTCGGTGAGGCCTCTTATGAA      |
| CPT1Arv                            | CTTGCTGCCTGAATGTGAGTTGG       |
| SLC25A20fw                         | GTTATCTGGCGTATTCACCACA        |
| SLC25A20rv                         | GTCCAGTGTACTTGCTTTCTCC        |
| VEGFAfw                            | GCGGAGAAAGCATTGTGTTGT         |
| VEGFArv                            | CGGCTTGTCACATCTGCAAC          |
| SLC2A1fw                           | GGTTGTGCCATACTCATGACC         |
| SLC2A1rv                           | CACATAGGACATCCAGGGTAGC        |
| ADSSL1fw                           | CAGGCAGGAAGAGGCGCTGC          |
| ADSSL1rv                           | GGCCAGCGCAGTGAATCCGT          |
| ANGPTL4fw (1 <sup>st</sup> exon)   | GCCTCAGCGGATGGAGATTT          |
| ANGPTL4rv (1 <sup>st</sup> intron) | GAGTTGCTGGATCCTGCTGT          |
| ANGPTL4fw (2 <sup>nd</sup> intron) | GAGGTGGTGAGAAGTGGACG          |
| ANGPTL4rv (3 <sup>rd</sup> exon)   | GGTCTAGGTGCTTGTGGTCC          |
| ANGPTL4fw (5 <sup>th</sup> intron) | TTCTAGTGGGGACAGAGGCA          |
| ANGPTL4rv (6 <sup>th</sup> exon)   | CCCGTGATGCTATGCACCTT          |

---

**Supplemental Table S3B. Primers for site-directed mutagenesis of the HRE and PPRE**

---

|          |                                            |
|----------|--------------------------------------------|
| mutHRE1  | 3' - GCACACCCAAGGGCTAGATCTCAGGCTGCCACTCAT  |
| mutHRE2  | 5' - CCGAGTAGCTGTAAGAGATCTCCACCACACCCGGCT  |
| mutHRE3  | 5' - GGGGGAAAGAAGAGTCAGATCTCCCACGGTTCGTAG  |
| mutPPRE1 | 5' - CAGGCCCGCCAAGTAGAGATCTGTTTCAGAGCTGGGA |
| mutPPRE2 | 5' - GATGGGAGGAAAGTAGAGATCTGGGGAGATGCCTGA  |
| mutPPRE3 | 3' - CCAGCCGGAAAAGTAGAGATCTGGTTCGAAATGAGTC |

---

**Supplemental Table S3C. Primers list for ChIP assay**

---

|                                                              |                       |
|--------------------------------------------------------------|-----------------------|
| ANGPTL4 PPRE at 3rd intron +3500fw                           | CCTTACTGGATGGGAGGAAAG |
| ANGPTL4 PPRE at 3rd intron +3500rv                           | CCCAGAGTGACCAGGAAGAC  |
| ANGPTL4 Negative Control for PPAR $\beta/\delta$ +15000fw    | GCCTATAGCCTGCAGCTCAC  |
| ANGPTL4 Negative Control for PPAR $\beta/\delta$ +15000rv    | CAAGTGGAGAAGGGTACGGA  |
| ANGPTL4 HIF1 $\alpha$ binding site for H3K27ac -1800fw       | TAGGGGAATGGGTAGGGAAG  |
| ANGPTL4 HIF1 $\alpha$ binding site for H3K27ac -1800rv       | AGTTCTCAGGCAGGTGGAGA  |
| ANGPTL4 PPAR $\beta/\delta$ binding site for H3K27ac +3200fw | TAGCATCTCAGCGTGGTCAG  |
| ANGPTL4 PPAR $\beta/\delta$ binding site for H3K27ac +3200rv | TGAGCCAAGAGTCTGGGAGT  |
| ANGPTL4 TSS for Pol II fw                                    | ACCGACCTCCCGTTAGCCCC  |
| ANGPTL4 TSS for Pol II rv                                    | CGGAGAACCAGCCCTGGGGA  |

---

**Supplemental Table S3D. Primers and TaqMan probe for 3C assay**

---

| Target analysis                         |                                    |
|-----------------------------------------|------------------------------------|
| ANGPTL4 Target Anchor Fw (TSS-3kb, HRE) | TGGTTTTCTGTGCCAGCCTC               |
| ANGPTL4 Target Anchor TaqMan probe      | (6-FAM) CCTTCCTGACAGGGTATAG (MGB)  |
| ANGPTL4 Control Anchor Fw1 (TSS-4kb)    | AACACGGCAAAAATCCTGTC               |
| ANGPTL4 Control Anchor TaqMan probe1    | (6-FAM) TGCCTATAGTCCCAGCTGCT (MGB) |
| ANGPTL4 Control Anchor Fw2 (TSS+6kb)    | CCAGAGAGGCTTTGCAGATT               |
| ANGPTL4 Control Anchor TaqMan probe2    | (6-FAM) CCTACTCCCTCCCACACTCA (MGB) |
| ANGPTL4 Rv (TSS+5.3kb, PPRE)            | CCTGACCACGCTGAGATGCTA              |
| ANGPTL4 Rv (TSS-10kb)                   | AATGGCTCACGCCTGTAATC               |
| ANGPTL4 Rv (TSS-8kb)                    | TCGGTCCCTGAAAGGAGATA               |
| ANGPTL4 Rv (TSS-6kb)                    | CCCGTACTCCCACACGTA                 |
| ANGPTL4 Rv (TSS+1kb)                    | CCAGGCAAGGGAGTCTTTCT               |
| ANGPTL4 Rv (TSS+4kb)                    | TGTAGAGACGGGGGTTTCAC               |
| ANGPTL4 Rv (TSS+15kb)                   | GCCTCCCTCCCTCTATCATC               |

---
